# Supplementary material
Source: PubMed Central journal article supplement (PMC3839632)
Supplement: NIHMS522094-supplement-ESI.pdf [file NIHMS522094-supplement-ESI.pdf]

## **Supplementary materials**

# **Liquid chromatography-matrix-assisted laser desorption/ionization mass spectrometric imaging with sprayed matrix for improved sensitivity, reproducibility and quantitation**

**Zichuan Zhang<sup>a</sup>, Jun Kuang<sup>b</sup> and Lingjun Li<sup>\*ac</sup>**

*<sup>a</sup>School of Pharmacy, University of Wisconsin, 777 Highland Avenue, Madison, Wisconsin  
53705, United States*

*<sup>b</sup>Department of Chemical and Biological Engineering, University of Wisconsin, 1415  
Engineering Drive., Madison, Wisconsin 53706, United States*

*<sup>c</sup>Department of Chemistry, University of Wisconsin, 1101 University Avenue, Madison,  
Wisconsin 53706, United States*

\*Corresponding author

Tel.: +1 (608) 265-8491

Fax: +1 (608) 262-5345

E-mail: lli@pharmacy.wisc.edu

**Table S1 List of putative neuropeptides identified from blue crab PO by LC-MSI****platform with sprayed matrix (mass range from *m/z* 600 to 2500\*)**

| <i>m/z</i> | Sequence   | Neuropeptide Family |
|------------|------------|---------------------|
| 653.30     |            |                     |
| 657.27     |            |                     |
| 668.66     |            |                     |
| 673.28     |            |                     |
| 685.26     |            |                     |
| 695.29     | NFLRFa     | RFa                 |
| 701.26     |            |                     |
| 717.32     |            |                     |
| 720.30     |            |                     |
| 733.30     |            |                     |
| 734.30     |            |                     |
| 743.39     |            |                     |
| 754.36     | GQYAFGLa   | AST-A               |
| 765.39     |            |                     |
| 770.34     | GGAYSFGLa  | AST-A               |
| 782.29     |            |                     |
| 784.33     | FVGGSRYa   | RYa                 |
| 787.38     |            |                     |
| 796.40     | NPYSFGLa   | AST-A               |
| 797.35     |            |                     |
| 803.33     |            |                     |
| 810.41     | AGPYSFGLa  | AST-A               |
| 811.33     |            |                     |
| 815.37     |            |                     |
| 817.52     | LRNLRFa    | RFa                 |
| 818.40     |            |                     |
| 820.38     | ASNNLRFa   | RFa                 |
| 832.39     | FYANRYa    | RYa                 |
| 834.37     |            |                     |
| 837.35     |            |                     |
| 838.38     | GDPYAFGLa  | AST-A               |
| 841.38     | AGGAYSFGLa | AST-A               |
| 843.35     |            |                     |
| 845.40     |            |                     |
| 854.43     | DGPYSFGLa  | AST-A               |
| 863.42     | pQGNFRFa   | RFa                 |
| 863.43     | PSGFLGMRa  | CabTRP              |
| 867.45     |            |                     |

| m/z     | Sequence           | Neuropeptide Family |
|---------|--------------------|---------------------|
| 869.38  |                    |                     |
| 876.36  |                    |                     |
| 880.40  |                    |                     |
| 883.42  | SNPYSFGLa          | AST-A               |
| 889.41  |                    |                     |
| 891.40  |                    |                     |
| 892.39  | SGHYIFGLa          | AST-A               |
| 894.40  |                    |                     |
| 898.41  | PDMYGFGLa          | AST-A               |
| 899.52  |                    |                     |
| 909.51  | ARPYSFGLa          | AST-A               |
| 911.41  | ARAYDFGLa          | AST-A               |
| 913.39  |                    |                     |
| 915.55  |                    |                     |
| 919.46  |                    |                     |
| 921.44  | PSM(O)RLRFa        | RFa                 |
| 931.48  |                    |                     |
| 936.43  |                    |                     |
| 937.54  | PRVYSFGLa/ELNFLRFa | AST-A/RFa           |
| 939.53  | TRPYSFGLa          | AST-A               |
| 940.40  | QRAYSFGLa          | AST-A               |
| 948.56  | PGVNFLRFa          | RFa                 |
| 950.50  | APSGFLGM(O)Ra      | CabTRP              |
| 956.37  | PFCNAFTGCa         | CCAP                |
| 959.52  | SGFYAPRYa          | RYa                 |
| 964.54  | TPSGFLGMRa         | CabTRP              |
| 965.58  | NRNFLRFa           | RFa                 |
| 970.62  |                    |                     |
| 976.48  | SGFYANRYa          | RYa                 |
| 978.34  |                    |                     |
| 986.46  |                    |                     |
| 987.58  |                    |                     |
| 991.48  |                    |                     |
| 992.54  | APSGFLGM(O)Ra      | CabTRP              |
| 1004.48 | FSGTYNFGLa         | AST-A               |
| 1008.52 |                    |                     |
| 1012.65 |                    |                     |
| 1014.58 |                    |                     |
| 1021.59 |                    |                     |
| 1022.63 | GNRNFLRFa          | RFa                 |
| 1025.52 |                    |                     |
| 1030.51 | pEGFYSQRYa         | RYa                 |

| m/z     | Sequence       | Neuropeptide Family |
|---------|----------------|---------------------|
| 1036.51 |                |                     |
| 1043.57 |                |                     |
| 1046.54 |                |                     |
| 1052.49 | SPRLTYFGLa     | AST-A               |
| 1053.48 | SDRNFLRFa      |                     |
| 1065.49 | RDNFVLRFa      | RFa                 |
| 1068.46 |                |                     |
| 1068.58 |                |                     |
| 1074.58 |                |                     |
| 1083.53 |                |                     |
| 1090.51 |                |                     |
| 1092.49 |                |                     |
| 1094.67 | ENRNFLRFa      | RFa                 |
| 1096.57 |                |                     |
| 1099.55 |                |                     |
| 1102.53 |                |                     |
| 1106.51 |                |                     |
| 1107.55 | AGWSSMRGAWa    | AST-B               |
| 1112.56 |                |                     |
| 1114.54 | SSRFVGGSRYa    | RYa                 |
| 1115.53 |                |                     |
| 1117.51 |                |                     |
| 1119.62 | SMPTLRLRFa     | RFa                 |
| 1123.58 | AGWSSM(O)RGAWa | AST-B               |
| 1125.56 | pQDLDHVFLR     | myosuppressin       |
| 1126.68 |                |                     |
| 1128.53 |                |                     |
| 1129.53 |                |                     |
| 1130.56 |                |                     |
| 1131.50 | DGPLAPFLRFa    | RFa                 |
| 1136.46 |                |                     |
| 1139.61 |                |                     |
| 1140.71 |                |                     |
| 1146.65 | GYSKNYLRFa     | RFa                 |
| 1147.54 | APQRNFLRFa     | RFa                 |
| 1148.71 |                |                     |
| 1150.58 |                |                     |
| 1155.58 |                |                     |
| 1158.63 | YGNRSFLRFa     | RFa                 |
| 1172.61 | AYNRSFLRFa     | RFa                 |
| 1182.59 | TSWGKFQGSWa    | AST-B               |
| 1186.61 | FDAFTTGFGHS    | Orcomyotropin       |

| m/z     | Sequence     | Neuropeptide Family |
|---------|--------------|---------------------|
| 1189.60 |              |                     |
| 1194.55 | VTWGKFQGSWa  | AST-B               |
| 1199.62 | NFDEIDRSGF   | Ork                 |
| 1204.58 |              |                     |
| 1205.57 |              |                     |
| 1208.55 |              |                     |
| 1209.65 | TGWNKFQGSWa  | AST-B               |
| 1211.56 |              |                     |
| 1213.74 | DEIDRSGFGFA  | Ork                 |
| 1219.62 |              |                     |
| 1220.60 | SGDWSSLRGAWa | AST-B               |
| 1222.65 | GNWNKFQGSWa  | AST-B               |
| 1224.64 |              |                     |
| 1227.57 |              |                     |
| 1230.71 | SLKSDTVTPLLG | CPRP                |
| 1231.58 |              |                     |
| 1232.69 | RSAQGLGKMER  | CPRP                |
| 1236.61 |              |                     |
| 1237.70 |              |                     |
| 1238.64 | SQPSKNYLRFa  | RFa                 |
| 1241.74 |              |                     |
| 1242.60 |              |                     |
| 1244.59 | DLKSDTVTPLR  | CPRP                |
| 1249.54 |              |                     |
| 1252.64 |              |                     |
| 1253.62 |              |                     |
| 1254.62 |              |                     |
| 1255.73 |              |                     |
| 1256.60 | NFDEIDRSGFG  | Ork                 |
| 1268.60 |              |                     |
| 1270.60 | NFDEIDRSGFA  | Ork                 |
| 1271.71 | pQLLDHVFLRFa | RFa                 |
| 1274.63 |              |                     |
| 1275.56 |              |                     |
| 1276.60 |              |                     |
| 1277.70 |              |                     |
| 1284.59 |              |                     |
| 1286.57 | NFDEIDRSSFG  | Ork                 |
| 1287.81 | ASLKSDTVTPLR | CPRP                |
| 1288.68 | QDLDHVFLRFa  | RFa                 |
| 1293.64 | STNWSSLRSAWa | AST-B               |
| 1300.60 | NFDEIDRSSFA  | Ork                 |

| m/z     | Sequence      | Neuropeptide Family |
|---------|---------------|---------------------|
| 1306.69 |               |                     |
| 1308.79 |               |                     |
| 1315.60 |               |                     |
| 1316.67 |               |                     |
| 1318.78 |               |                     |
| 1320.70 |               |                     |
| 1322.68 |               |                     |
| 1322.74 |               |                     |
| 1328.67 |               |                     |
| 1328.68 |               |                     |
| 1330.78 |               |                     |
| 1334.63 |               |                     |
| 1341.69 |               |                     |
| 1342.68 | DVRTPALRLRFa  | RFa                 |
| 1344.79 |               |                     |
| 1348.62 |               |                     |
| 1352.76 |               |                     |
| 1356.61 |               |                     |
| 1372.77 | KIFEPLRDKNL   | OTHERS              |
| 1378.60 |               |                     |
| 1380.66 | NNNWTKFQGSWa  | AST-B               |
| 1381.69 | GYRKPPFNGSIFa | SIFa                |
| 1382.67 |               |                     |
| 1386.77 |               |                     |
| 1388.75 |               |                     |
| 1394.77 |               |                     |
| 1399.56 |               |                     |
| 1402.63 |               |                     |
| 1403.62 | NFDEIDRSGFGF  | Ork                 |
| 1404.72 |               |                     |
| 1408.74 |               |                     |
| 1410.75 |               |                     |
| 1413.64 |               |                     |
| 1415.83 | RSAEGLGRMGRL  | CPRP                |
| 1416.74 |               |                     |
| 1420.71 |               |                     |
| 1426.65 |               |                     |
| 1429.87 |               |                     |
| 1431.84 |               |                     |
| 1433.72 | NFDEIDRSSFGF  | Ork                 |
| 1437.81 |               |                     |
| 1439.78 |               |                     |

| m/z     | Sequence        | Neuropeptide Family |
|---------|-----------------|---------------------|
| 1445.85 |                 |                     |
| 1449.65 |                 |                     |
| 1451.80 |                 |                     |
| 1453.77 |                 |                     |
| 1455.80 |                 |                     |
| 1458.74 | RSAQGLGKMERLL   | CPRP                |
| 1459.81 |                 |                     |
| 1463.85 |                 |                     |
| 1470.74 | VPNDWAHFRGSWa   | AST-B               |
| 1471.67 |                 |                     |
| 1473.84 |                 |                     |
| 1474.71 | NFDEIDRSGFGFA   | Ork                 |
| 1475.71 | DFDEIDRSGFGFA   | Ork                 |
| 1478.79 | TPLGDLSGSLGHPVE | CPRP<br>fragment    |
| 1486.85 |                 |                     |
| 1489.82 |                 |                     |
| 1492.68 |                 |                     |
| 1495.76 |                 |                     |
| 1500.84 |                 |                     |
| 1502.70 | NFDEIDRSGFGFV   | Ork                 |
| 1504.68 | NFDEIDRSSFGFA   | Ork                 |
| 1506.71 |                 |                     |
| 1508.83 |                 |                     |
| 1514.72 |                 |                     |
| 1515.58 |                 |                     |
| 1516.88 |                 |                     |
| 1517.76 | NFDEIDRSGFGFN   | Ork                 |
| 1518.68 |                 |                     |
| 1522.82 |                 |                     |
| 1530.80 |                 |                     |
| 1532.74 | NFDEIDRSSFGFV   | Ork                 |
| 1534.69 |                 |                     |
| 1544.81 |                 |                     |
| 1547.66 | NFDEIDRSSFGFN   | Ork                 |
| 1549.27 |                 |                     |
| 1550.64 |                 |                     |
| 1556.70 |                 |                     |
| 1562.89 |                 |                     |
| 1586.87 | MFAPLAWPKGGARWa | AST-B               |
| 1589.77 |                 |                     |
| 1593.61 |                 |                     |

---

| m/z     | Sequence | Neuropeptide Family |
|---------|----------|---------------------|
| 1602.81 |          |                     |
| 1603.78 |          |                     |
| 1608.84 |          |                     |
| 1615.66 |          |                     |
| 1624.82 |          |                     |
| 1630.89 |          |                     |
| 1631.63 |          |                     |
| 1637.65 |          |                     |
| 1643.64 |          |                     |
| 1646.86 |          |                     |
| 1659.63 |          |                     |
| 1665.57 |          |                     |
| 1671.88 |          |                     |
| 1681.55 |          |                     |
| 1686.88 |          |                     |
| 1703.84 |          |                     |
| 1706.81 |          |                     |
| 1720.80 |          |                     |
| 1728.81 |          |                     |
| 1790.99 |          |                     |
| 1802.88 |          |                     |
| 1814.94 |          |                     |
| 1820.88 |          |                     |
| 1824.84 |          |                     |
| 1828.99 |          |                     |
| 1889.88 |          |                     |
| 1899.79 |          |                     |
| 1915.76 |          |                     |
| 1921.77 |          |                     |
| 1935.82 |          |                     |
| 1943.75 |          |                     |
| 1957.81 |          |                     |
| 2019.92 |          |                     |
| 2041.96 |          |                     |
| 2057.94 |          |                     |
| 2063.89 |          |                     |
| 2072.93 |          |                     |
| 2105.99 |          |                     |
| 2172.99 |          |                     |
| 2205.95 |          |                     |
| 2241.00 |          |                     |
| 2237.92 |          |                     |

---



| m/z     | Sequence | Neuropeptide Family |
|---------|----------|---------------------|
| 2370.11 |          |                     |
| 2392.09 |          |                     |
| 2415.22 |          |                     |
| 2441.09 |          |                     |
| 2446.15 |          |                     |
| 2468.16 |          |                     |

\* The sequence and family were matched to previously identified neuropeptides

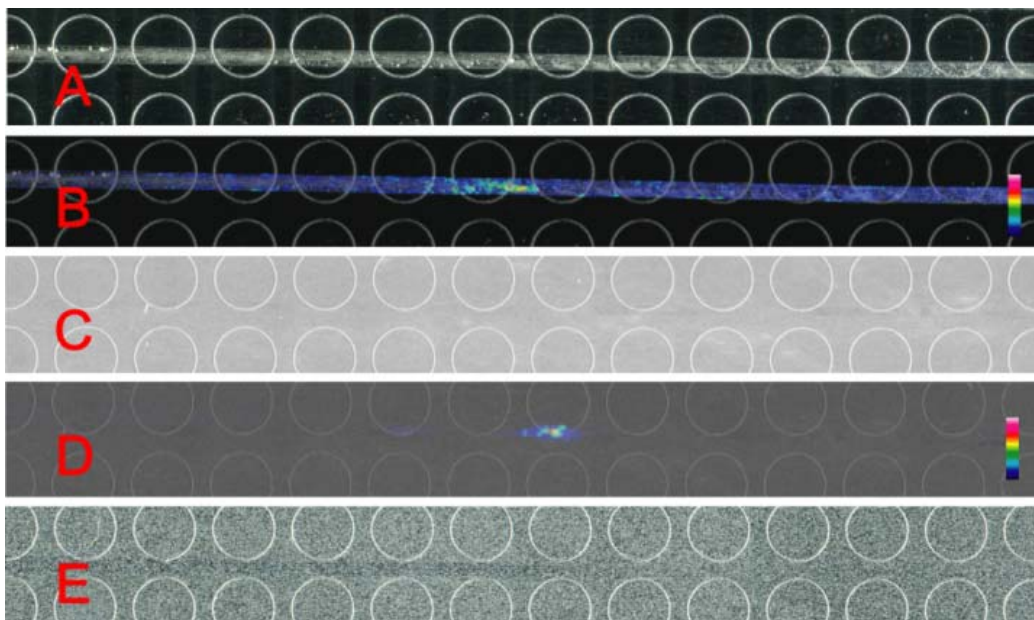

**Fig. S1 Comparison of sprayed matrix and capillary-delivered matrix for LC-MSI.**

A: The LC trace collected on MALDI plate with matrix delivered by capillary and mixed with LC eluent. “Marble like” surface can be observed due to the irregular size of matrix crystal. B: The image of  $m/z$  1292.9 with LC-MSI analysis using capillary delivered matrix. C: The LC trace collected on the MALDI plate (dried LC trace invisible covered by highly uniform matrix) with matrix sprayed by a sprayer. D: The image of  $m/z$  1292.9 with LC-MSI analysis using sprayed matrix. Less peak diffusion and significantly reduced background noise was obtained compared to panel B. E: The LC trace collected on MALDI plate and with matrix sprayed via “air brush”.

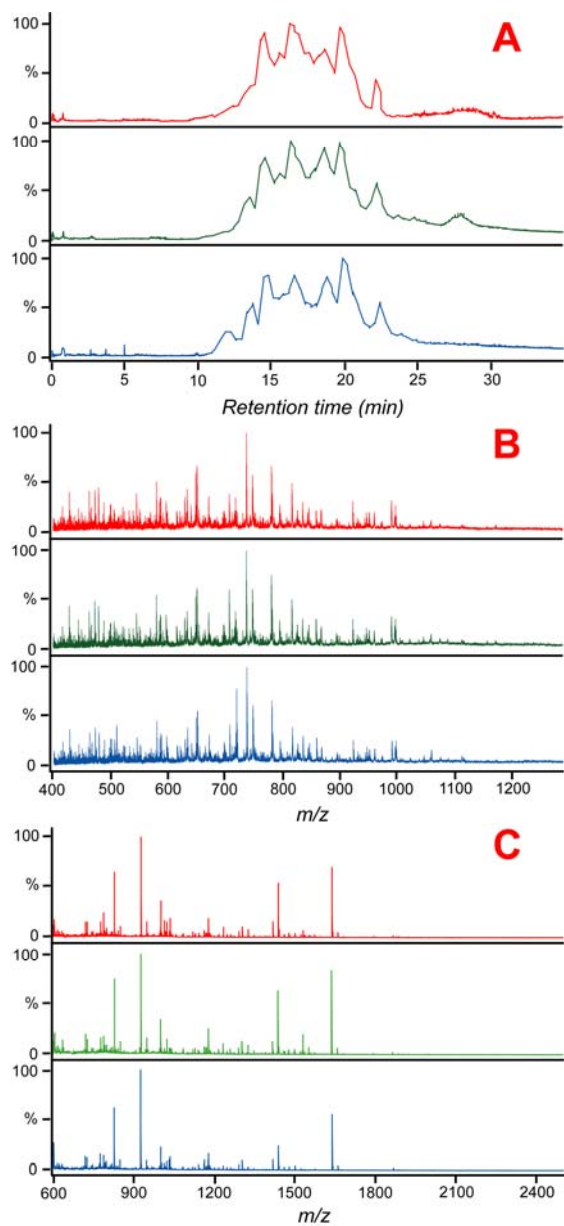

**Fig. S2 Reproducibility of monolithic RPLC column on ESI MS and MALDI MSI with BSA tryptic peptides.**

A: The total ion chromatograms of three LC runs on consecutive days. B: Mass spectra of three LC-MS runs on consecutive days with ESI-QTOF detection. C: Mass spectra of three LC-MS runs on consecutive days with MALDI MSI detection.
